# Supplementary material
Source: publisher figshare collection journal article supplement (https://plos.figshare.com/articles/dataset/_/7816373)
Supplement: Supplementary file [file 1]

**S1 Table. Countries by classes and subclasses**

| Class | Subclass | Country                          |
|-------|----------|----------------------------------|
| 1.1   | 1.1.1    | Argentina                        |
| 1.1   | 1.1.1    | Australia                        |
| 1.1   | 1.1.1    | Canada                           |
| 1.1   | 1.1.1    | Czechia                          |
| 1.1   | 1.1.1    | Denmark                          |
| 1.1   | 1.1.1    | France                           |
| 1.1   | 1.1.1    | Germany                          |
| 1.1   | 1.1.1    | Hungary                          |
| 1.1   | 1.1.1    | Ireland                          |
| 1.1   | 1.1.1    | Kazakhstan                       |
| 1.1   | 1.1.1    | Lithuania                        |
| 1.1   | 1.1.1    | Malaysia                         |
| 1.1   | 1.1.1    | Netherlands                      |
| 1.1   | 1.1.1    | New Zealand                      |
| 1.1   | 1.1.1    | Poland                           |
| 1.1   | 1.1.1    | United States of America         |
| 1.1   | 1.1.2    | Brazil                           |
| 1.1   | 1.1.2    | Bulgaria                         |
| 1.1   | 1.1.2    | Costa Rica                       |
| 1.1   | 1.1.2    | Ecuador                          |
| 1.1   | 1.1.2    | Guatemala                        |
| 1.1   | 1.1.2    | Indonesia                        |
| 1.1   | 1.1.2    | Lao People's Democratic Republic |
| 1.1   | 1.1.2    | Malawi                           |
| 1.1   | 1.1.2    | Mauritius                        |
| 1.1   | 1.1.2    | Myanmar                          |
| 1.1   | 1.1.2    | Paraguay                         |
| 1.1   | 1.1.2    | Republic of Moldova              |
| 1.1   | 1.1.2    | Thailand                         |
| 1.1   | 1.1.2    | Ukraine                          |
| 1.1   | 1.1.2    | Uruguay                          |
| 1.1   | 1.1.2    | Viet Nam                         |
| 1.2   | 1.2.1    | Algeria                          |
| 1.2   | 1.2.1    | Austria                          |
| 1.2   | 1.2.1    | Azerbaijan                       |
| 1.2   | 1.2.1    | Belarus                          |
| 1.2   | 1.2.1    | Belgium                          |
| 1.2   | 1.2.1    | Chile                            |
| 1.2   | 1.2.1    | Colombia                         |
| 1.2   | 1.2.1    | Croatia                          |
| 1.2   | 1.2.1    | Dominican Republic               |
| 1.2   | 1.2.1    | Egypt                            |
| 1.2   | 1.2.1    | Estonia                          |
| 1.2   | 1.2.1    | Finland                          |
| 1.2   | 1.2.1    | Greece                           |

|     |       |                                           |
|-----|-------|-------------------------------------------|
| 1.2 | 1.2.1 | Iran                                      |
| 1.2 | 1.2.1 | Israel                                    |
| 1.2 | 1.2.1 | Italy                                     |
| 1.2 | 1.2.1 | Japan                                     |
| 1.2 | 1.2.1 | Jordan                                    |
| 1.2 | 1.2.1 | Kuwait                                    |
| 1.2 | 1.2.1 | Latvia                                    |
| 1.2 | 1.2.1 | Lebanon                                   |
| 1.2 | 1.2.1 | Luxembourg                                |
| 1.2 | 1.2.1 | Mexico                                    |
| 1.2 | 1.2.1 | Norway                                    |
| 1.2 | 1.2.1 | Panama                                    |
| 1.2 | 1.2.1 | Peru                                      |
| 1.2 | 1.2.1 | Portugal                                  |
| 1.2 | 1.2.1 | Republic of Korea                         |
| 1.2 | 1.2.1 | Romania                                   |
| 1.2 | 1.2.1 | Russian Federation                        |
| 1.2 | 1.2.1 | Saudi Arabia                              |
| 1.2 | 1.2.1 | Slovakia                                  |
| 1.2 | 1.2.1 | Slovenia                                  |
| 1.2 | 1.2.1 | South Africa                              |
| 1.2 | 1.2.1 | Spain                                     |
| 1.2 | 1.2.1 | Sweden                                    |
| 1.2 | 1.2.1 | Switzerland                               |
| 1.2 | 1.2.1 | The former Yugoslav Republic of Macedonia |
| 1.2 | 1.2.1 | Trinidad and Tobago                       |
| 1.2 | 1.2.1 | Tunisia                                   |
| 1.2 | 1.2.1 | Turkey                                    |
| 1.2 | 1.2.1 | United Arab Emirates                      |
| 1.2 | 1.2.1 | United Kingdom                            |
| 1.2 | 1.2.1 | Venezuela                                 |
| 1.2 | 1.2.2 | Albania                                   |
| 1.2 | 1.2.2 | Angola                                    |
| 1.2 | 1.2.2 | Armenia                                   |
| 1.2 | 1.2.2 | Bangladesh                                |
| 1.2 | 1.2.2 | Benin                                     |
| 1.2 | 1.2.2 | Bosnia and Herzegovina                    |
| 1.2 | 1.2.2 | Burkina Faso                              |
| 1.2 | 1.2.2 | Cambodia                                  |
| 1.2 | 1.2.2 | Cameroon                                  |
| 1.2 | 1.2.2 | China                                     |
| 1.2 | 1.2.2 | Côte d'Ivoire                             |
| 1.2 | 1.2.2 | Cuba                                      |
| 1.2 | 1.2.2 | El Salvador                               |
| 1.2 | 1.2.2 | Gambia                                    |
| 1.2 | 1.2.2 | Georgia                                   |

|     |       |                                       |
|-----|-------|---------------------------------------|
| 1.2 | 1.2.2 | Ghana                                 |
| 1.2 | 1.2.2 | Guinea                                |
| 1.2 | 1.2.2 | Guinea-Bissau                         |
| 1.2 | 1.2.2 | Honduras                              |
| 1.2 | 1.2.2 | India                                 |
| 1.2 | 1.2.2 | Jamaica                               |
| 1.2 | 1.2.2 | Kyrgyzstan                            |
| 1.2 | 1.2.2 | Lesotho                               |
| 1.2 | 1.2.2 | Mali                                  |
| 1.2 | 1.2.2 | Mauritania                            |
| 1.2 | 1.2.2 | Morocco                               |
| 1.2 | 1.2.2 | Mozambique                            |
| 1.2 | 1.2.2 | Nepal                                 |
| 1.2 | 1.2.2 | Nicaragua                             |
| 1.2 | 1.2.2 | Niger                                 |
| 1.2 | 1.2.2 | Nigeria                               |
| 1.2 | 1.2.2 | Pakistan                              |
| 1.2 | 1.2.2 | Philippines                           |
| 1.2 | 1.2.2 | Senegal                               |
| 1.2 | 1.2.2 | Sierra Leone                          |
| 1.2 | 1.2.2 | Sri Lanka                             |
| 1.2 | 1.2.2 | Sudan                                 |
| 1.2 | 1.2.2 | Togo                                  |
| 1.2 | 1.2.2 | Turkmenistan                          |
| 1.2 | 1.2.2 | Uganda                                |
| 1.2 | 1.2.2 | United Republic of Tanzania           |
| 1.2 | 1.2.2 | Uzbekistan                            |
| 1.2 | 1.2.2 | Yemen                                 |
| 2.1 |       | Bolivia                               |
| 2.1 |       | Rwanda                                |
| 2.2 |       | Botswana                              |
| 2.2 |       | Central African Republic              |
| 2.2 |       | Chad                                  |
| 2.2 |       | Congo                                 |
| 2.2 |       | Democratic People's Republic of Korea |
| 2.2 |       | Haiti                                 |
| 2.2 |       | Kenya                                 |
| 2.2 |       | Liberia                               |
| 2.2 |       | Madagascar                            |
| 2.2 |       | Mongolia                              |
| 2.2 |       | Namibia                               |
| 2.2 |       | Tajikistan                            |
| 2.2 |       | Zambia                                |
| 2.2 |       | Zimbabwe                              |

Source: own elaboration.
