# Supplementary material
Source: publisher figshare collection journal article supplement (https://plos.figshare.com/articles/dataset/_/7816373)
Supplement: Supplementary file [file 1]

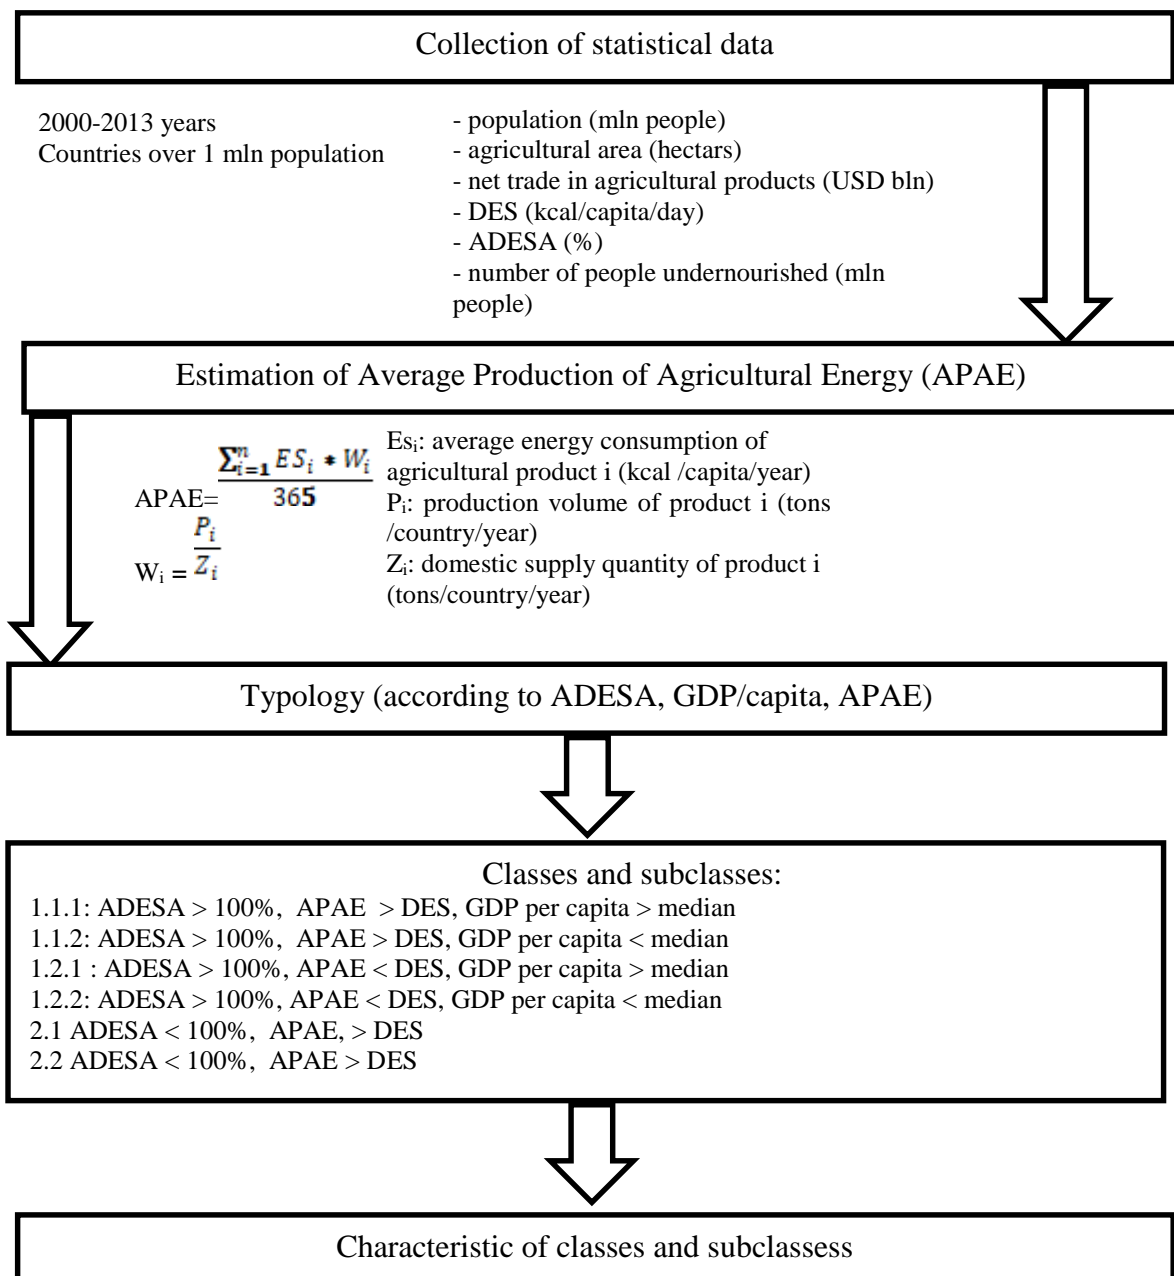

**S1 File. Diagram of the research process**

Source: own elaboration.
